# Supplementary material for: Persistent Core Populations Shape the Microbiome Throughout the Water Column in the North Pacific Subtropical Gyre
Source: Front Microbiol. 2019 Oct 1;10:2273. doi: 10.3389/fmicb.2019.02273 (PMC6779783; doi:10.3389/fmicb.2019.02273)
Supplement: Supplementary file 3 [file Table_3.XLSX]

## Sheet: Suppl. Table 3
Supplementary Table 3: Fidelity of the 16S rRNA and COG0012 genes for species delineation
Gene	Taxonomy	Cutoff (% nucleotide ID)	Average F-Score
16S	NCBI (24.07.2012)	99.1	0.985924
16S	NCBI (24.07.2012)	97	0.975012
COG0012	NCBI (24.07.2012)	94.8	0.992318
